# Supplementary material
Source: PubMed Central journal article supplement (PMC2741706)

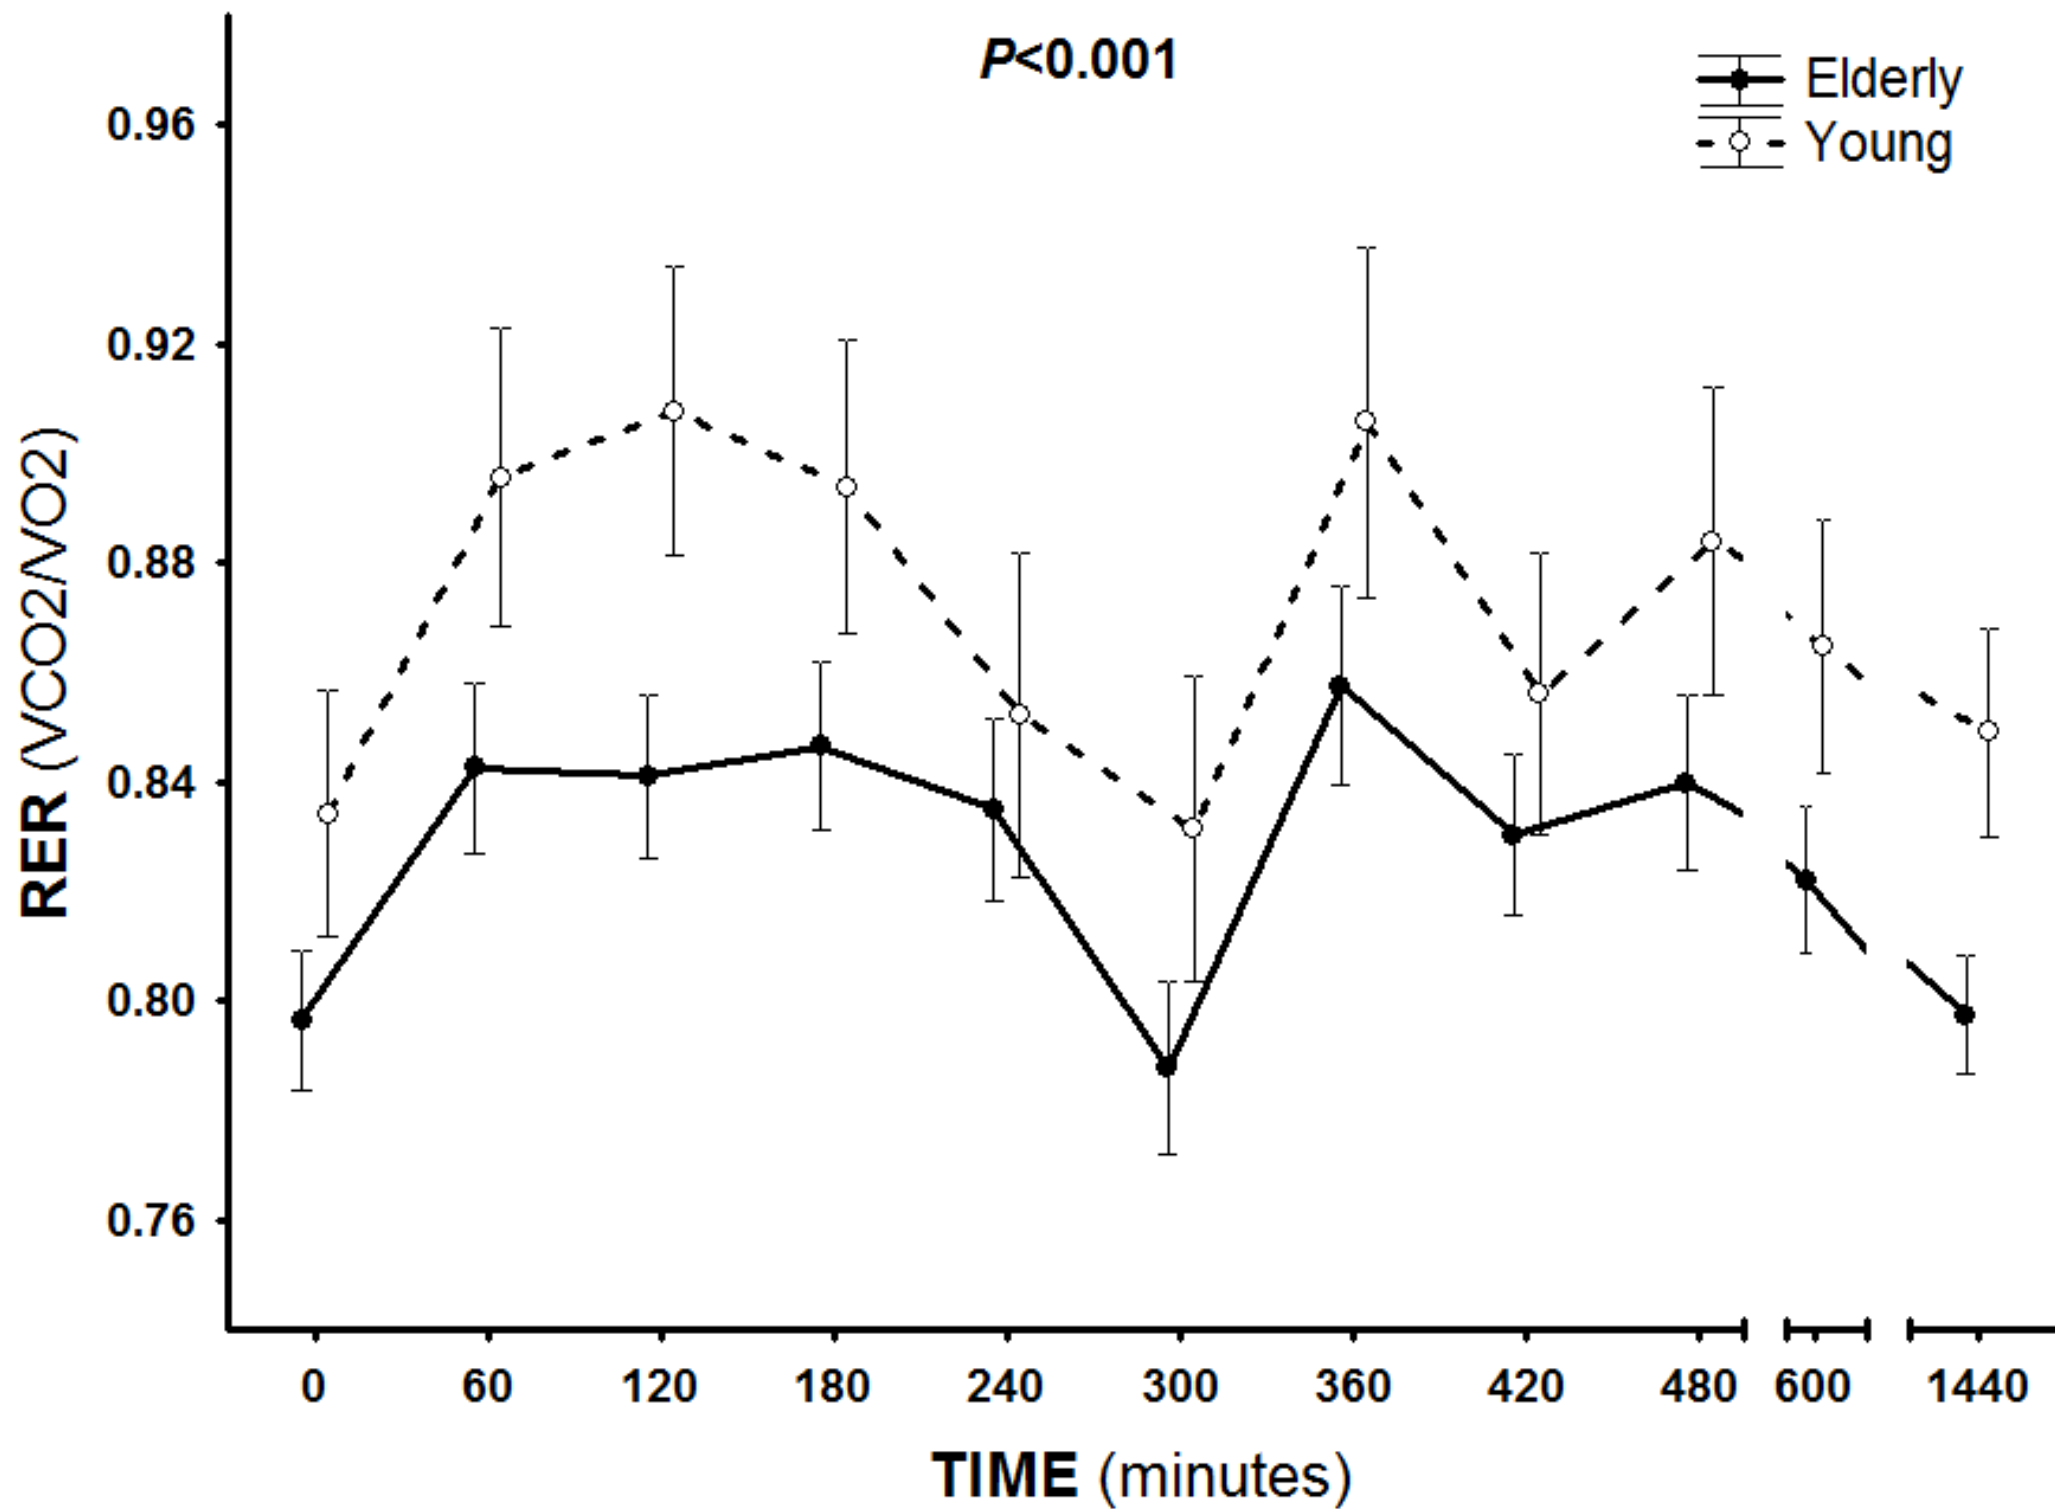

Supplement: jc.2009-0165_1.pdf [file jc.2009-0165_1.pdf]

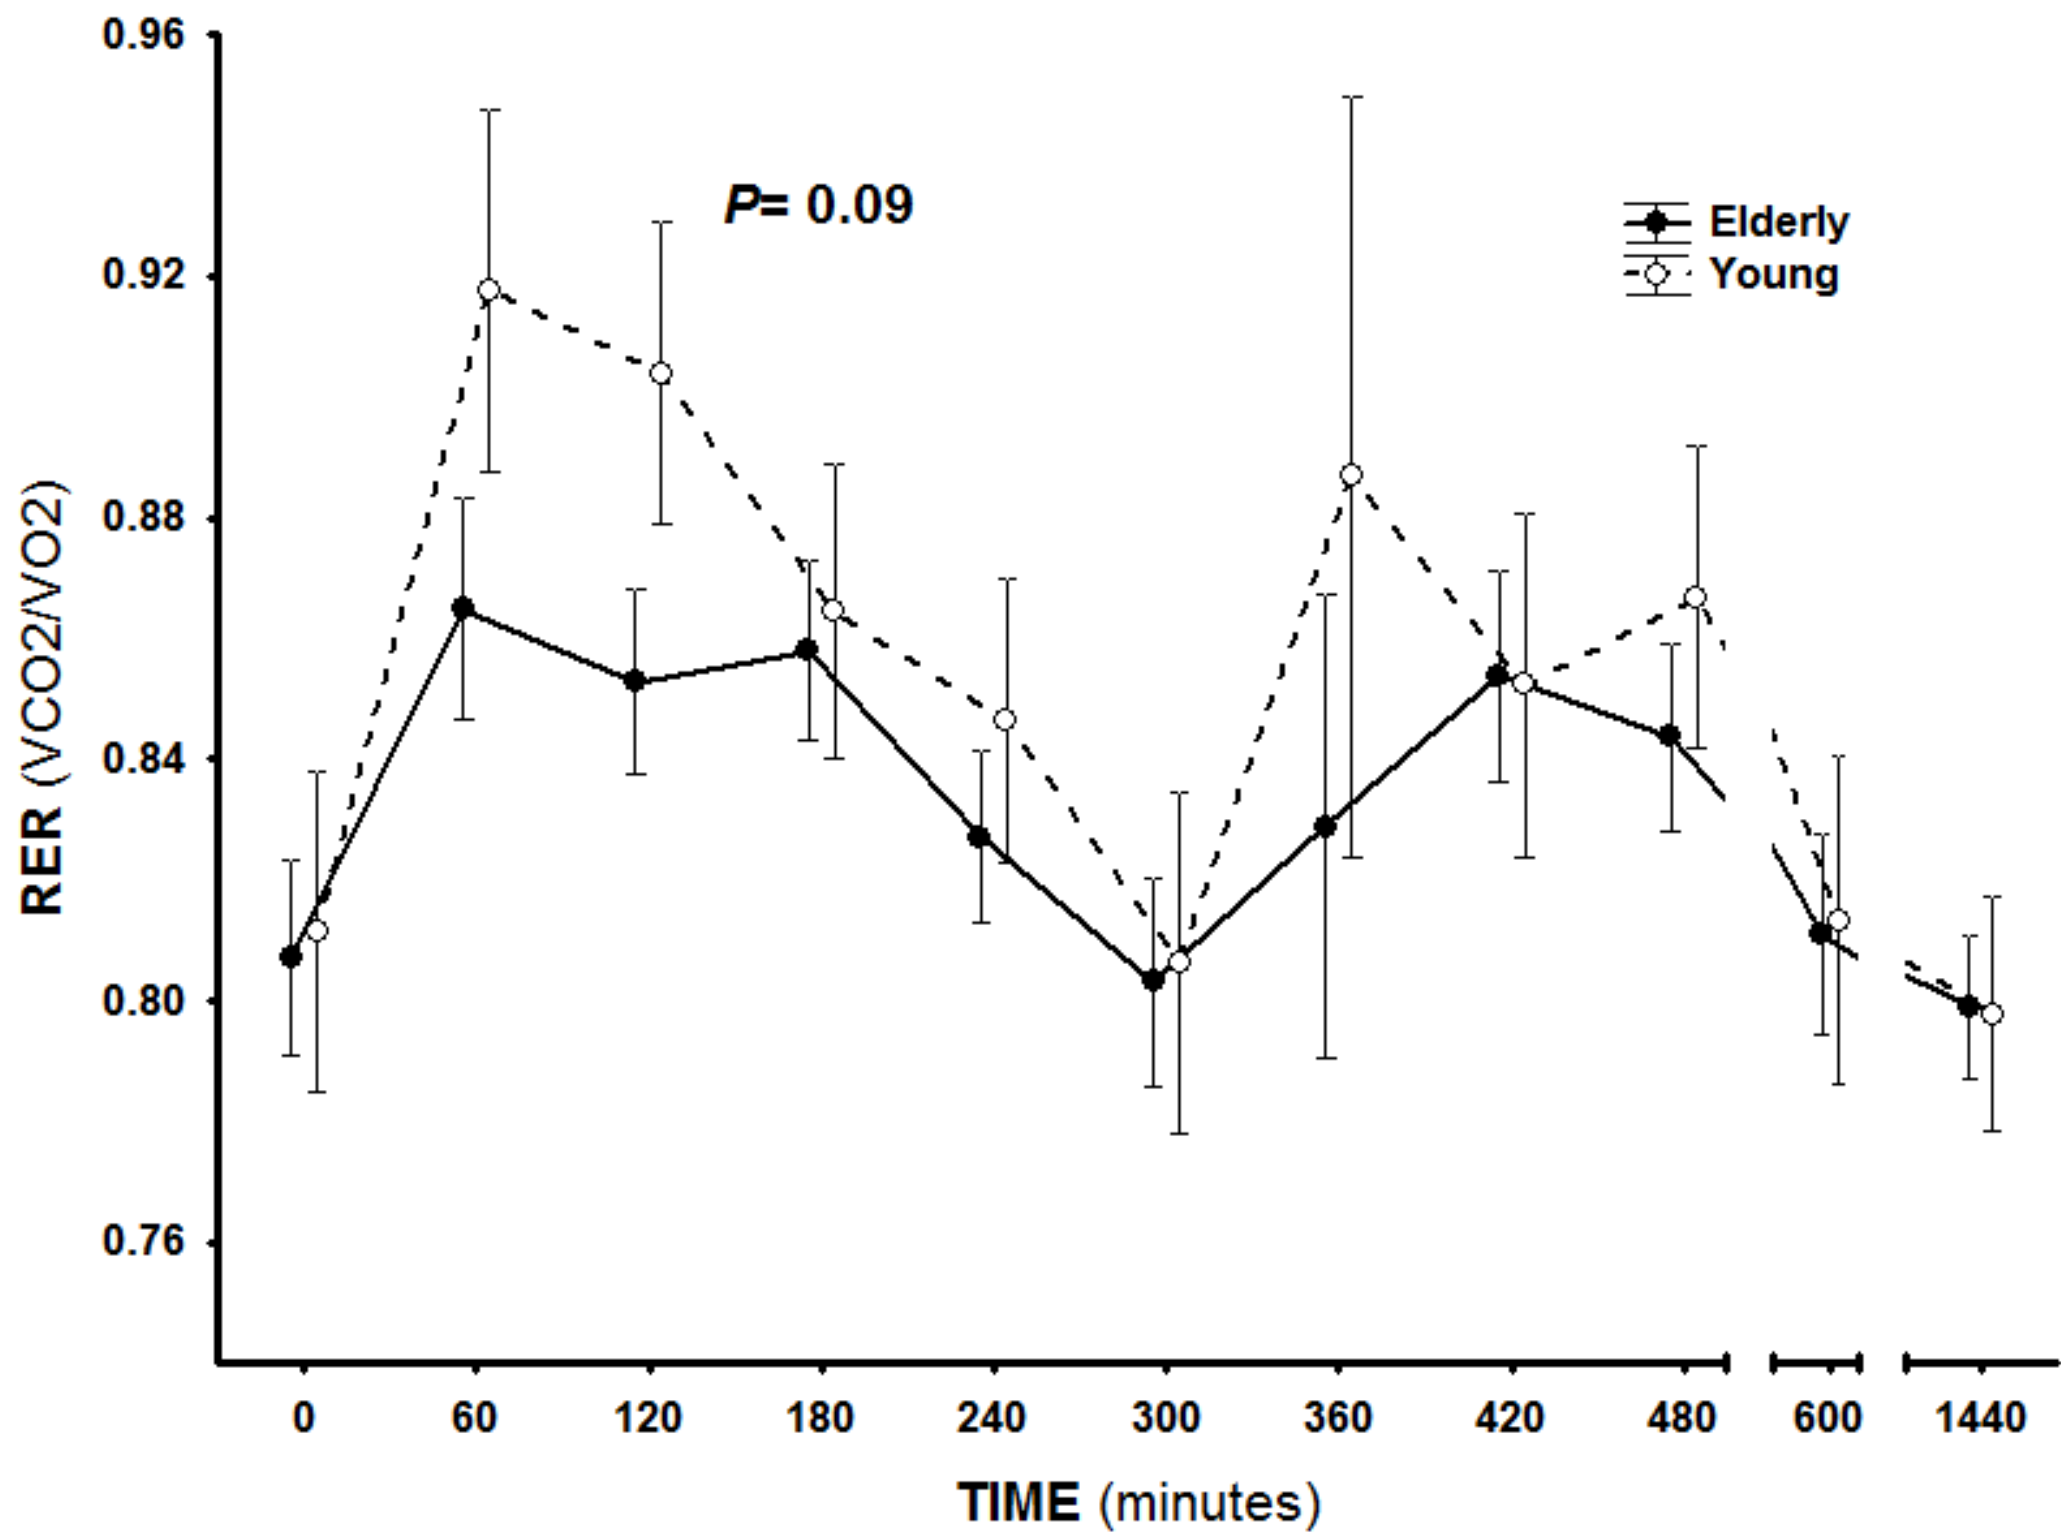

Supplement: jc.2009-0165_2.pdf [file jc.2009-0165_2.pdf]
